# Supplementary material
Source: publisher figshare collection journal article supplement (https://frontiersin.figshare.com/ndownloader/files/35249494)
Supplement: Supplementary file [file 35249494]

## Supplementary Figure S1

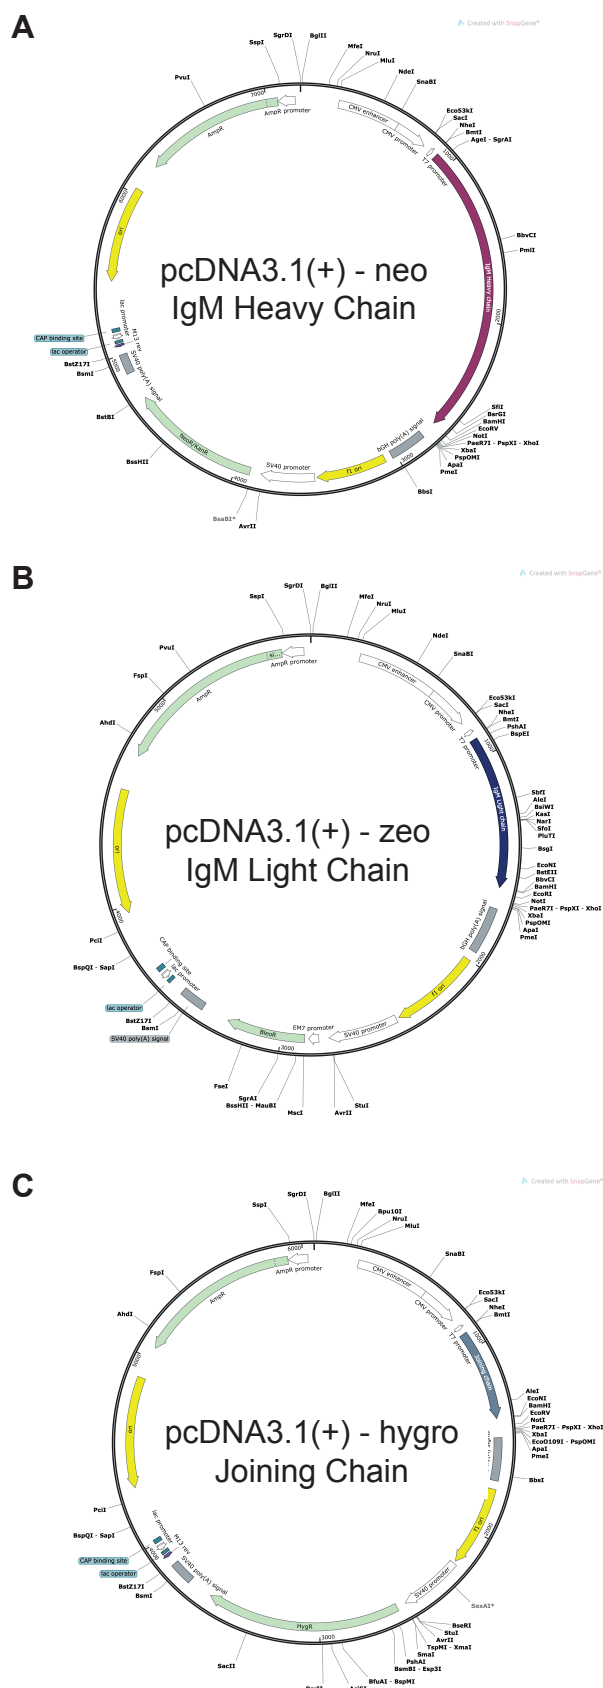

**Supplementary Figure S1.** Plasmid maps of pcDNA3.1(+) constructs used to obtain stable HEK293F cell lines expressing IgM617-HL, IgM617-HLJ, IgM012-HL and IgM012-HLJ.

# Supplementary Figure S2

## C1q CAPTURE

## IgM BINDING

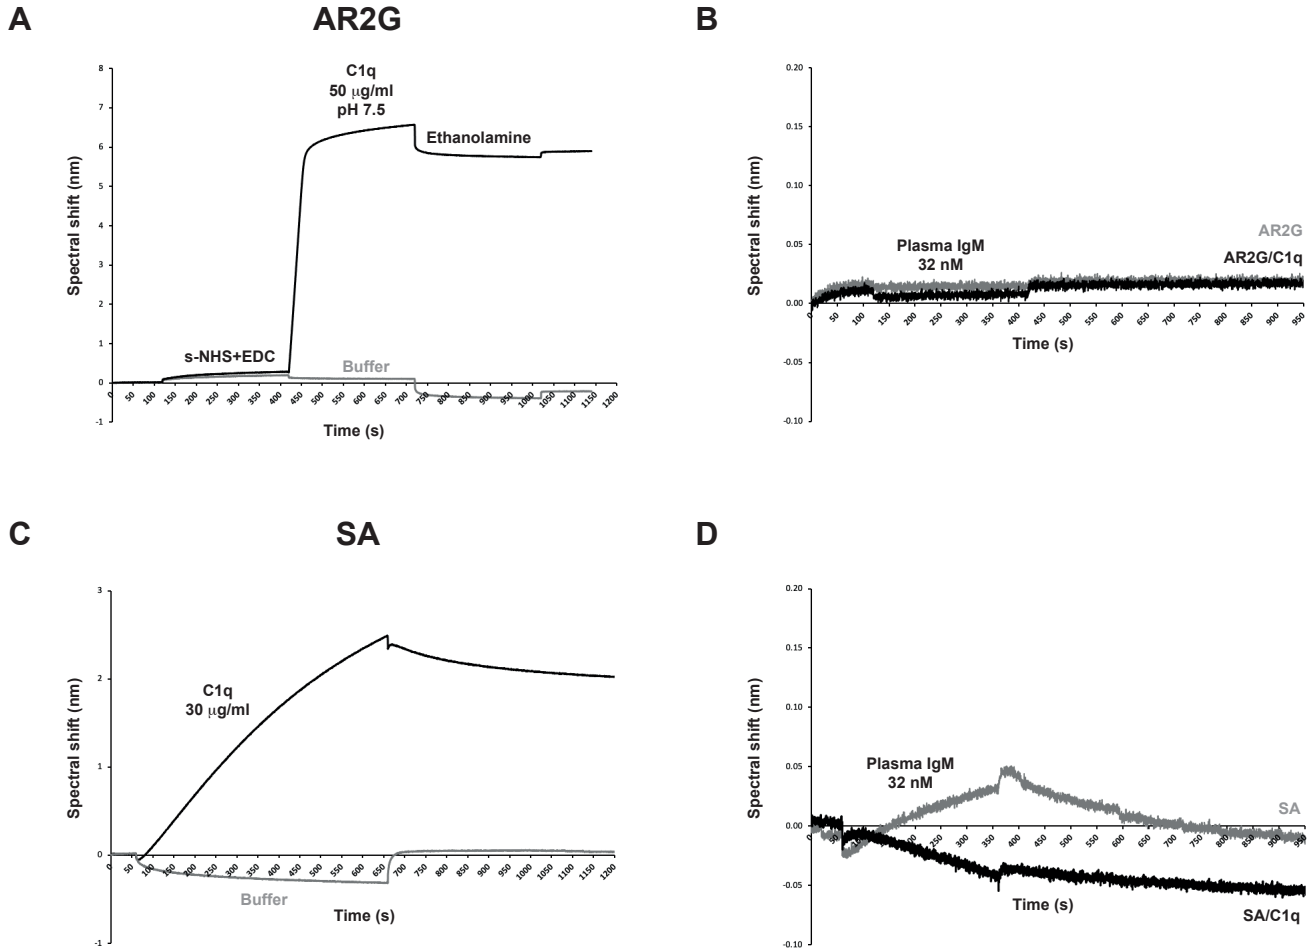

**Supplementary Figure S2.** Examples of C1q captures on (A) AR2G or (C) SA biosensors. (B and D) and examples of plasma IgM bindings at 32 nM to functionalized biosensors (in black) or reference biosensors (in grey).

# Supplementary Figure S3

## IgM CAPTURE

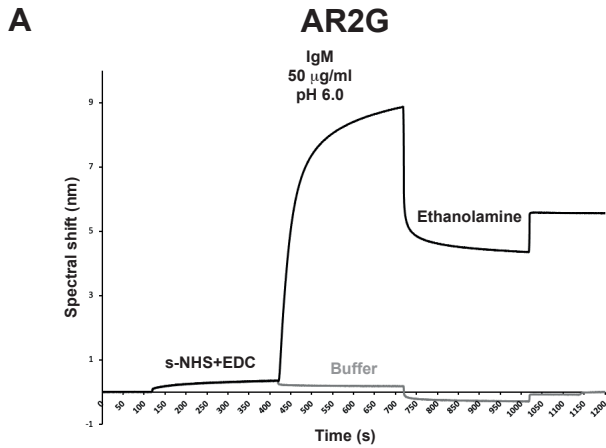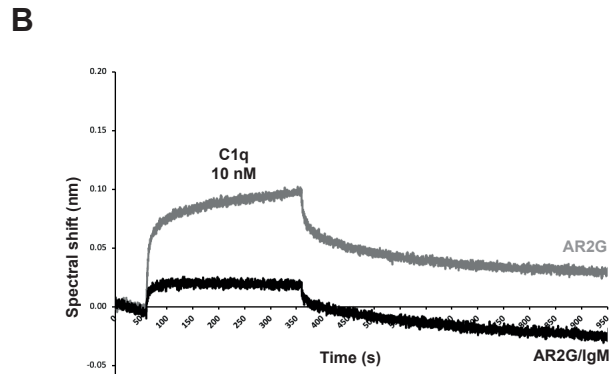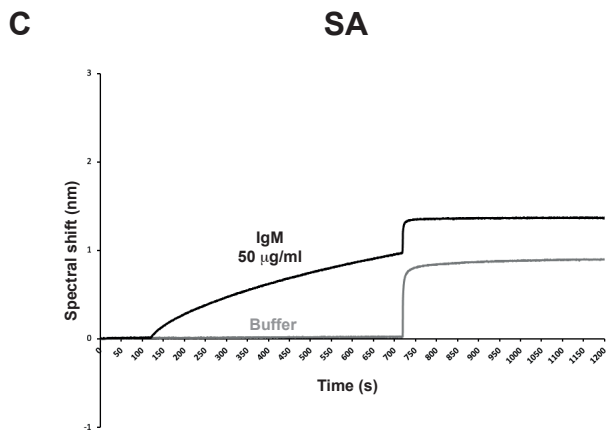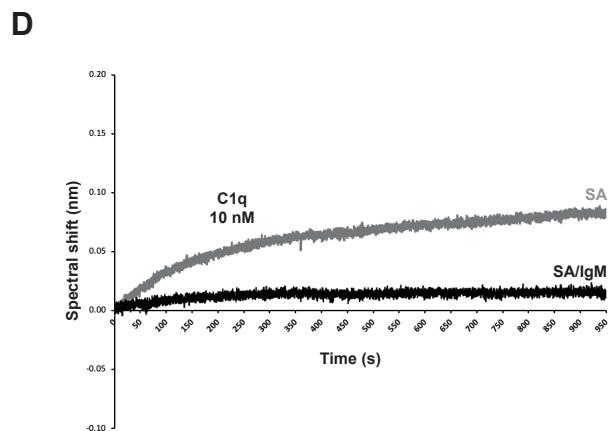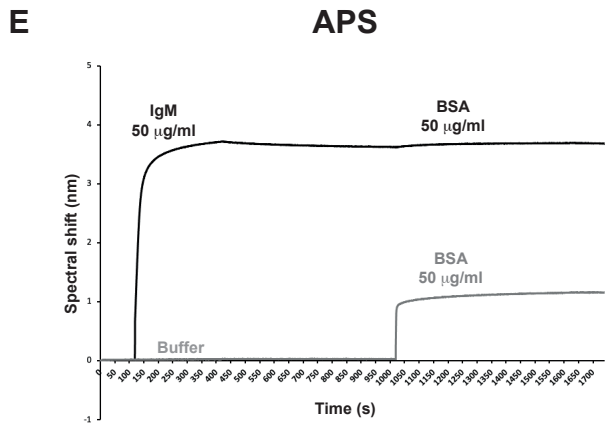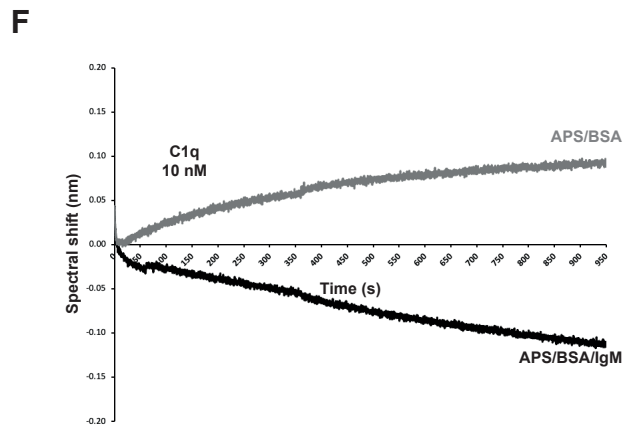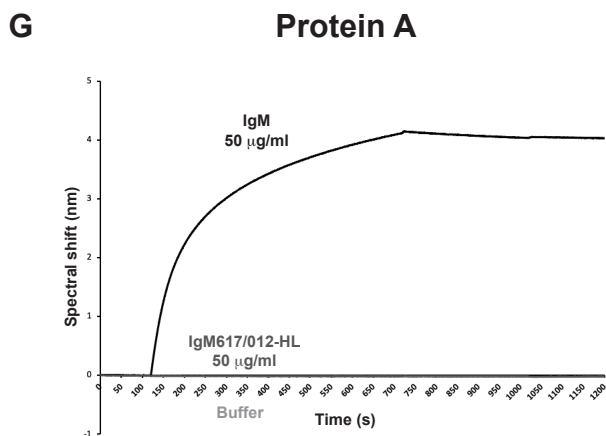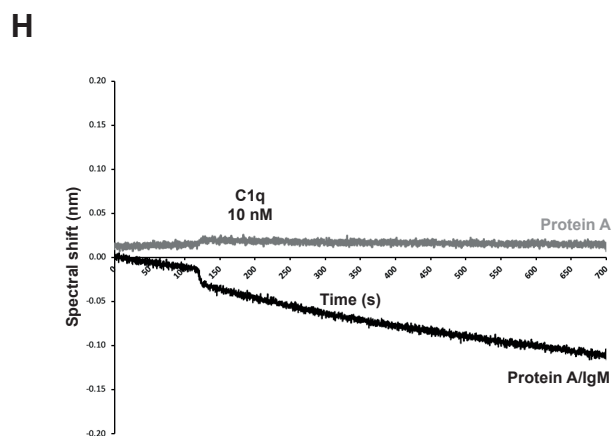

## IgM CAPTURE

## C1q BINDING

### I SA/mouse anti- $\mu$ chain

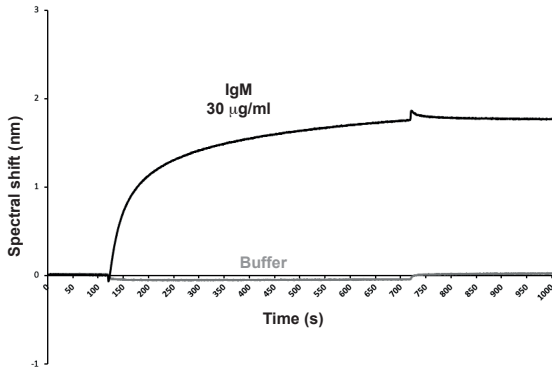

### J

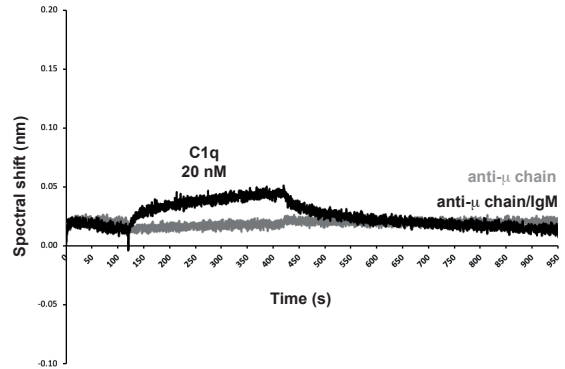

### K SA/goat anti- $\mu$ chain

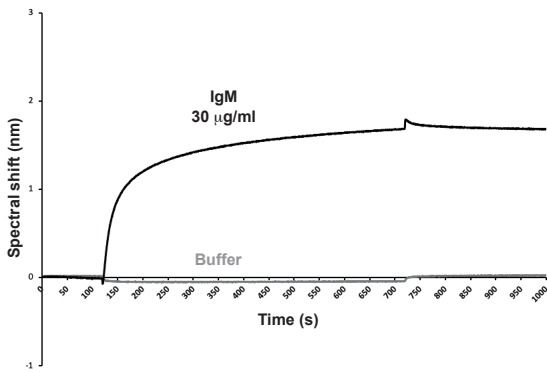

### L

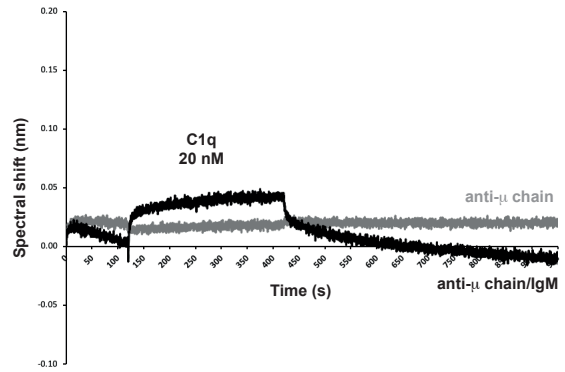

### M SA/Capture select anti- $\mu$ chain

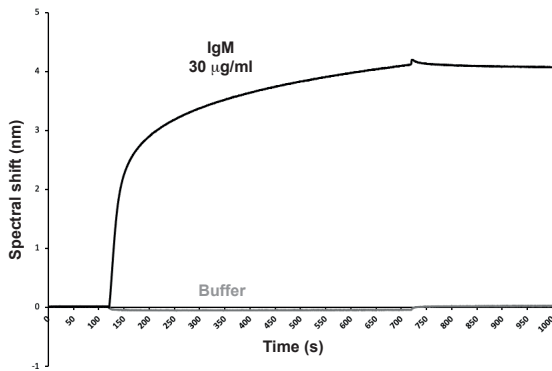

### N

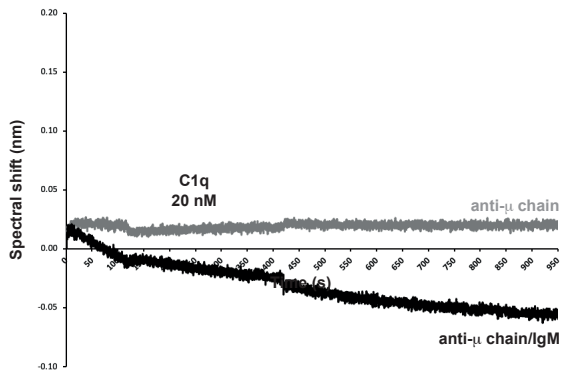

**Supplementary Figure S3.** Examples of plasma IgM captures on (A) AR2G, (C) SA, (E) APS, (G) Protein A, (I, K, M) anti- $\mu$  chain biosensors and (B, D, F, H, J, L, N) of plasma C1q binding at 10 or 20 nM to functionalized (in black) and reference (in grey) biosensors.

# Supplementary Figure S4

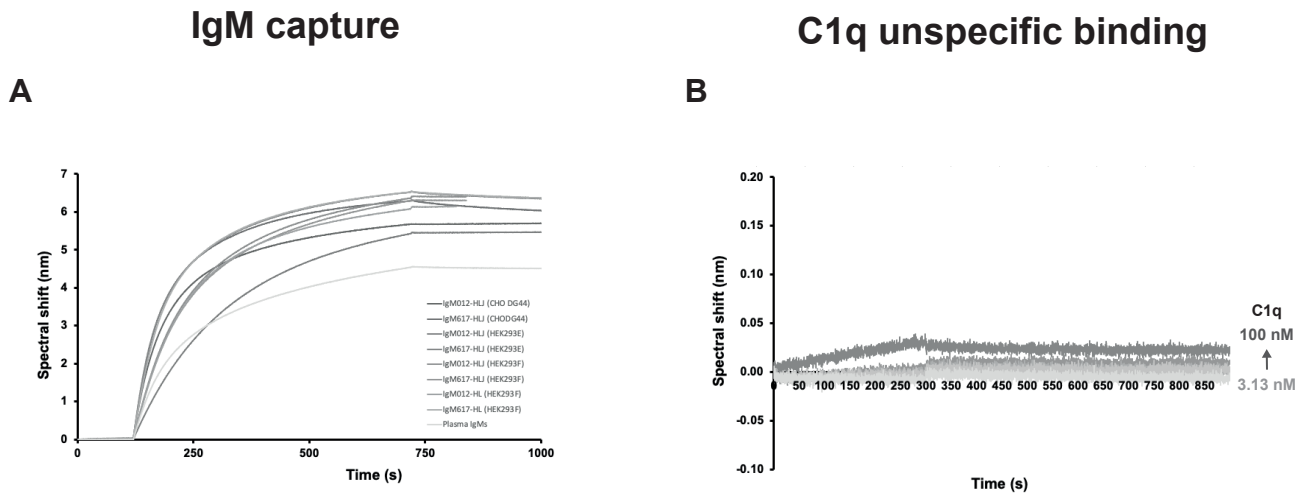

# Supplementary Figure S5

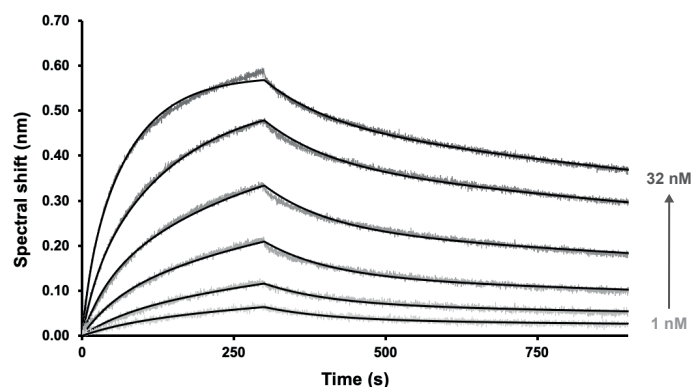

| $k_{a1}$         | $k_{d1}$           | $K_{D1}$            | $k_{a2}$         | $k_{d2}$           | $K_{D2}$            |
|------------------|--------------------|---------------------|------------------|--------------------|---------------------|
| $10^5/\text{Ms}$ | $10^{-4}/\text{s}$ | $10^{-9} \text{ M}$ | $10^6/\text{Ms}$ | $10^{-3}/\text{s}$ | $10^{-9} \text{ M}$ |
| $4.06 \pm 0.01$  | $4.02 \pm 0.03$    | $10.00 \pm 0.07$    | $2.14 \pm 0.02$  | $9.28 \pm 0.01$    | $4.33 \pm 0.01$     |

**Supplementary Figure S5.** Kinetics analysis of the interaction between C1q from plasma and recombinant C1r<sub>2</sub>C1s<sub>2</sub>. C1q was immobilized on AR2G biosensor (supplementary Figure S1). The tetramer was expressed in mammalian cells (Bally et al., 2019). The functionalized biosensors were dipped in wells containing C1r<sub>2</sub>C1s<sub>2</sub> at different concentrations (1, 2, 4, 8, 16, 32 nM). The binding signals (grey-scaled sensorgrams) were obtained by subtracting the signals from empty AR2G biosensor and from zero-concentration samples. Fitted curves are depicted as black lines and were obtained by global fitting using a 2:1 heterogeneous ligand model. Kinetics parameters and affinities are reported in the table.
